# Supplementary material for: Association between antimicrobial usage and resistance on commercial broiler and layer farms in Bangladesh
Source: Frontiers journal article supplement (doi:10.3389/fvets.2024.1435111), 2024-08-29
Supplement: Data_Sheet_1.pdf [file Data_Sheet_1.pdf]

**Supplementary material for paper “Association between antimicrobial usage and  
resistance on commercial broiler and layer farms in Bangladesh”**

## **Bacterial culture**

### ***Escherichia coli***

The sample (10 µl) was streaked onto a MacConkey (MC) agar plate (Neogen corporation) incubated aerobically overnight at 37°C. Any suspected *E. coli* colonies were subcultured onto Eosin methylene blue (EMB) agar (Neogen corporation) and incubated aerobically at 37°C for 18-24 hours. Suspected colonies (MC agar, lactose positive; EMB, metallic green sheen) were subcultured onto 5% blood agar (Blood agar base, (BA) (Neogen corporation). If biochemical results were Triple Sugar Iron Agar, fermentation of glucose and gas production but no sulphur reduction; indole reaction, positive; citrate utilisation, negative then the sample was considered as *E. coli* positive. All positive isolates were stored at -80°C in brain heart infusion broth with 50% glycerol (Neogen corporation) (Kakkar et al., 2018).

### ***Salmonella* spp.**

The sample, (100 µl overnight culture, divided into 3 separate drops was plated on to novobiocin (Oxoid Ltd., Basingstoke, Hampshire, RG24 8PW, UK) supplemented Modified Semisolid Rappaport Vassiliadis (MSRV) agar (Oxoid Ltd.) and incubated for 24 hours at 41.5°C. Production of any gray white, turbid zone from the centre of the inoculation on the MSRV agar plates was suspected *Salmonella* and was streaked onto brilliant green (BG) agar (Oxoid Ltd.) and xylose lysine deoxycholate (XLD) agar (Neogen corporation) by using an inoculating loop which was dipped into the periphery of the opaque zone. Plates were incubated overnight aerobically at 37°C. After incubation the plates were examined for the presence of typical colonies of *Salmonella*. In case of BGA, light pink colony against a rose-pink background and red colonies with black centers on XLD agar were observed. Any suspected *Salmonella* colonies on BG or XLD agar were verified and confirmed by biochemical tests

including Triple Sugar Iron agar slant reaction (dextrose fermentation, H<sub>2</sub>S produced), indole reaction (negative) and citrate utilisation test (positive).

Suspected *Salmonella* colonies were transferred to 5% blood agar (Blood agar base, Oxoid Ltd.) incubated overnight aerobically at 37°C and stored at -80°C in brain heart infusion broth with 50% glycerol (Neogen corporation).

### **Antimicrobial susceptibility testing**

*E. coli* and *Salmonella* spp. underwent Kirby-Bauer disk diffusion antimicrobial susceptibility testing against 12 antimicrobials: amoxicillin (10 µg), ampicillin (10 µg), cephalixin (30 µg), doxycycline (30 µg), erythromycin (15 µg), enrofloxacin (5 µg), gentamicin (10 µg), neomycin (10 µg), ciprofloxacin (5 µg), azithromycin (15 µg), colistin (10 µg), pefloxacin (5 µg), sulphonamide and trimethoprim (25 µg). These antimicrobials belong to the following classes:

|                 |                               |
|-----------------|-------------------------------|
| Beta lactams    | Amoxicillin                   |
|                 | Ampicillin                    |
|                 | Cephalexin                    |
| Tetracycline    | Doxycycline                   |
| Macrolide       | Erythromycin                  |
|                 | Azithromycin                  |
| Quinolone       | Enrofloxacin                  |
|                 | Ciprofloxacin                 |
|                 | Pefloxacin                    |
| Polymyxin       | Colistin                      |
| Sulphonamides   | Sulphonamide and trimethoprim |
| Aminoglycosides | Gentamicin                    |
|                 | Neomycin                      |

*E. coli* and *Salmonella* colonies from BA were mixed with phosphate buffer saline (PBS) by vortexing and the turbidity adjusted to the MacFarland 0.5 turbidity standard. The broth was streaked on to a Mueller Hinton agar plate (Difco Laboratories, Sparks, MD, USA). Antibiotic discs (HiMedia (Vadhani Industrial Estate, L.B.S. Marg, Mumbai - 400 086, India) for *E. coli* and Oxoid (Thermo Fisher Scientific, 168 Third Avenue, Waltham, MA USA 02451) for *Salmonella* spp. were applied aseptically onto the surface of the inoculated plates with multidisc dispenser.

The animal CLSI guidelines were used to interpret enrofloxacin (5 µg) as it is the only antimicrobial which has a veterinary breakpoint for poultry (CLSI, 2019). The human CLSI guidelines were used to interpret amoxicillin (30 µg), ampicillin (25 µg), cephalexin (25 µg), doxycycline (30 µg), erythromycin (15 µg), gentamicin (10 µg), neomycin (30 µg), azithromycin (30 µg), pefloxacin (5 µg), and trimethoprim sulphonamides (25 µg) (CLSI, 2018). For colistin (10 µg), the breakpoint used was what was recommended by the manufacturer (Rosco Diagnostica, Taadtrugaardsvej 30, 2630 Denmark). *E. coli* ATCC25922, and *Salmonella* B41 (S. Kentucky)/2010/Bangladesh, were used for quality control (QC) and susceptibility testing. .

**Table S1.** Results of antimicrobial susceptibility testing by antimicrobial classes of *E. coli* and *Salmonella* spp. isolates cultured from cloacal and environmental samples collected on commercial chicken farms in the Chattogram district of Bangladesh

| Antimicrobial classes         | <i>E. coli</i><br>Resistance % (N farms) |                   |                         | <i>Salmonella</i> spp.<br>Resistance % (N farms) |                  |                         |
|-------------------------------|------------------------------------------|-------------------|-------------------------|--------------------------------------------------|------------------|-------------------------|
|                               | Overall<br>(N=107)                       | Cloacal<br>(N=79) | Environmental<br>(N=81) | Overall<br>(N=11)                                | Cloacal<br>(N=3) | Environmental<br>(N=10) |
| Amoxicillin                   | 100.0 (107)                              | 100.0 (79)        | 100.0 (81)              | 100.0 (11)                                       | 100.0 (3)        | 100.0 (10)              |
| Ampicillin                    | 100.0 (107)                              | 100.0 (79)        | 100.0 (81)              | 100.0 (11)                                       | 100.0 (3)        | 100.0 (10)              |
| Cephalexin                    | 100.0 (107)                              | 100.0 (79)        | 100.0 (81)              | 100.0 (11)                                       | 100.0 (3)        | 100.0 (10)              |
| Doxycycline                   | 100.0 (107)                              | 100.0 (79)        | 100.0 (81)              | 90.9 (10)                                        | 100.0 (3)        | 90.0 (9)                |
| Erythromycin                  | 100.0 (107)                              | 98.7% (78)        | 98.8 (80)               | Not performed                                    |                  |                         |
| Azithromycin                  | 92.5 (99)                                | 89.9 (71)         | 91.4 (74)               |                                                  |                  |                         |
| Enrofloxacin                  | 95.3 (102)                               | 92.4 (73)         | 86.4 (70)               | 100.0 (11)                                       | 100.0 (3)        | 100.0 (10)              |
| Ciprofloxacin                 | Not performed                            |                   |                         | 100.0 (11)                                       | 100.0 (3)        | 100.0 (10)              |
| Pefloxacin                    | 93.5 (100)                               | 91.1 (72)         | 85.2 (69)               | 100.0 (11)                                       | 100.0 (3)        | 100.0 (10)              |
| Colistin                      | 5.6 (6)                                  | 3.8 (3)           | 3.7 (3)                 | 18.2 (2)                                         | 0.0 (0)          | 20.0 (2)                |
| Sulphonamide and trimethoprim | 100.0 (107)                              | 97.5 (77)         | 95.1 (77)               | 54.5 (6)                                         | 100.0 (3)        | 30.0 (3)                |
| Gentamicin                    | 83.2 (89)                                | 82.3 (65)         | 74.1 (60)               | 72.7 (8)                                         | 33.3 (1)         | 70.0 (7)                |
| Neomycin                      | 75.7 (81)                                | 72.2 (57)         | 67.9 (55)               | 81.8 (9)                                         | 33.3 (1)         | 80.0 (8)                |

Resistant includes isolates identified with resistant and intermediate susceptibility.

**Table S2.** Antimicrobial classes used on commercial layer and broiler farms where *E. coli* (N=107) and *Salmonella* spp. (N=11) was cultured in Chattogram, Bangladesh.

| <b>Antimicrobial classes</b> | <b>Usage % (N farms) on farms where <i>E. coli</i> was cultured</b> | <b>Usage % (N farms) where <i>Salmonella</i> spp. was cultured</b> |
|------------------------------|---------------------------------------------------------------------|--------------------------------------------------------------------|
| Quinolones                   | 56.1 (60)                                                           | 45.5 (5)                                                           |
| Polymyxins                   | 43.0 (46)                                                           | 63.6 (7)                                                           |
| Macrolides                   | 30.8 (33)                                                           | 45.5 (5)                                                           |
| Aminoglycosides              | 29.9 (32)                                                           | 27.3 (3)                                                           |
| Beta lactams                 | 30.8 (33)                                                           | 54.5 (6)                                                           |
| Sulphonamides                | 29.0 (31)                                                           | 18.2 (2)                                                           |
| Tetracyclines                | 50.5 (54)                                                           | 63.6 (7)                                                           |

**Table S3.** Antimicrobial classes not used on commercial layer and broiler farms where *E. coli* (N=107) was cultured in Chattogram, Bangladesh and resistance to these antimicrobial classes.

| <b>Antimicrobial classes</b> | <b>N farms where <i>E. coli</i> was cultured, but antimicrobial classes were not used</b> | <b>Resistance % of non-user farms (N non-user farms resistant/Total N non-user) where <i>E. coli</i> was cultured</b> |
|------------------------------|-------------------------------------------------------------------------------------------|-----------------------------------------------------------------------------------------------------------------------|
| Quinolones                   | 47                                                                                        | 95.7 (45/47)                                                                                                          |
| Polymyxins                   | 61                                                                                        | 8.2 (5/61)                                                                                                            |
| Macrolides                   | 74                                                                                        | 100.0 (74/74)                                                                                                         |
| Aminoglycosides              | 75                                                                                        | 81.3 (61/75)                                                                                                          |
| Beta Lactams                 | 74                                                                                        | 100.0 (74/74)                                                                                                         |
| Sulphonamides                | 76                                                                                        | 100.0 (76/76)                                                                                                         |
| Tetracyclines                | 53                                                                                        | 100.0 (53/53)                                                                                                         |

## References

CLSI. (2018). *Performance standards for antimicrobial susceptibility testing, 28th edition*.

[https://clsi.org/media/1930/m100ed28\\_sample.pdf](https://clsi.org/media/1930/m100ed28_sample.pdf)

CLSI. (2019). *Performance standards for antimicrobial susceptibility testing*

Kakkar, M., Chatterjee, P., Chauhan, A. S., Grace, D., Lindahl, J., Beeche, A., Jing, F., &

Chotinan, S. (2018). Antimicrobial resistance in South East Asia: time to ask the right questions. *Glob Health Action*, 11(1), 1483637.

<https://doi.org/10.1080/16549716.2018.1483637>
